# Supplementary material
Source: publisher figshare collection journal article supplement (https://geolsoc.figshare.com/ndownloader/files/15541892)
Supplement: Supplementary file 1 [file 15541892]

#1. Functions for basic data analysis.
#Sampling rate is denoted by s.
#Functions are demonstrated for Weibull distribution with parameters shape and scale.
#For log-normal distribution, substitute dlnorm() for dweibull();
#rlnorm() for rweibull(); meanlog for shape; and sdlog for scale.
#Exponential distribution has an exact maximum-likelihood solution; see text. Log-likelihood
#function is given below ("LogL.e").

#Product of duration density and probability of being sampled at least once, for duration=t and sampling rate=s.
Pp.t<-function(t,s,shape,scale)
{
 return(dweibull(t,shape,scale)*(1-exp(-s*t)))
}

#Overall probability of being sampled at least once.
Pp<-function(s,shape,scale)
{
 return(integrate(Pp.t,0,Inf,s,shape,scale)$value)
}

#Product of duration density and probability of being sampled at exactly one horizon (i.e., range=0).
g0.t<-function(t,s,shape,scale)
{
 return(dweibull(t,shape,scale)*s*t*exp(-s*t))
}

#Product of duration density and probability that range=x (x>0).
gx.t<-function(t,x,s,shape,scale)
{
 arg<-dweibull(t,shape,scale,log=TRUE) + 2*log(s) + log(t-x) - s*(t-x)
 return(exp(arg))
}

#Probability that range=0, given that species is sampled at least once.
f0<-function(s,shape,scale)
{
 return(integrate(g0.t,0,Inf,s,shape,scale)$value/Pp(s,shape,scale))
}

#Density function: range=x (x>0), given that species is sampled at least once.
fx<-function(x,s,shape,scale)
{
 return(integrate(gx.t,x,Inf,x,s,shape,scale)$value/Pp(s,shape,scale))
}

#Log-likelihood of parameters, given observed ranges (rng).
#Return negative of log-likelihood for subsequent minimization.
LogL<-function(par,rng)
{
 s<-par[1] #sampling rate
 shape<-par[2]
 scale<-par[3]
 fx0<-f0(s,shape,scale)
 n0<-sum(rng==0)
 xx<-rng[which(rng>0)]
 fxx<-mapply(fx,xx,s,shape,scale)
 S<-n0*ifelse(fx0>0,log(fx0),0)+sum(ifelse(fxx>0,log(fxx),0))
 return(-S)
}

#Log-likelihood function for exponential distribution of durations. Returns negative log-likelihood.
LogL.e<-function(par,rng)
{
 s<-par[1]
 mu<-par[2] #extinction rate
 fx0<-mu/(mu+s)
 n0<-sum(rng==0)
 xx<-rng[which(rng>0)]
 fxx<-s*mu*exp(-mu*xx)/(mu+s)
 S<-n0*ifelse(fx0>0,log(fx0),0)+sum(ifelse(fxx>0,log(fxx),0))
 return(-S)
}

#Function to return solution via numerical optimization.
#xlo and xlup give the lower and upper limits on which to search the parameter space.
#These may need to be modified depending on the data and the assumed distribution of durations.
fit<-function(rng)
{
 xlo<-c(0.1,0.1,0.1)
 xup<-c(100,2.0,5)
 npar<-length(xlo)
 parinit<-runif(npar,min=xlo,max=xup) #initial parameter guess (random in this case)
 solution<-optim(parinit,LogL,rng=rng,lower=xlo,upper=xup,method="L-BFGS-B")
 return(solution)
}

#Estimate variance-covariance matrix of maximum-likelihood parameter values and standard errors,
#followed by example of parametric bootstrap to estimate standard error of a derived measure.
library(numDeriv)
solution<-fit(rng)
H<-hessian(LogL,solution$par,rng=rng) #information matrix
Sig<-solve(H) #variance-covariance matrix
Std.Errs<-sqrt(diag(Sig)) #standard errors
mu<-solution$par #vector of maximum-likelihood parameter estimates
library(MASS)
nrep<-1000 #number of parameter sets to draw
PARS<-mvrnorm(nrep,mu,Sig) #random samples from multivariate normal distribution
PP<-mapply(Pp,s=PARS[,1],shape=PARS[,2],scale=PARS[,3]) #proportion of species sampled
Std.Err<-sd(PP)


#2. Functions for simualation of stratigraphic ranges.
#Moran process, illustrated with exponential distribution of durations.
#mu=extinction rate; process assumes speciation rate equals extinction rate.
#n0=starting (and standing) diversity
#tmax=time at which to terminate process
moran<-function(mu,n0,tmax)
{
 T1<-numeric() #time of speciation
 T2<-numeric() #time of extinction
 nsp<-n0 #number of species
 T1[1:n0]<-0
 i<-0
 while (i<nsp)
 {
  i<-i+1
  dur<-rexp(1,mu) #duration
  T2[i]<-T1[i]+dur
  if (T2[i]<tmax)
  {
   nsp<-nsp+1
   T1[nsp]<-T2[i]
  }
  if (T2[i]>=tmax) T2[i]<-tmax #species still extant at tmax
 }
 return(list(T1=T1,T2=T2))
}

#Alternative "free-floating" diversification process, allowing for
#stochastic variation in diversity.
#lambda=speciation rate
#mu=extinction rate
#n0=starting diversity
#tmax=time at which to terminate process
#Algorithm follows Przeworski and Wall (1998, Paleobiology 24:498).
free_float<-function(lambda,mu,n0,tmax)
{
 T1<-numeric() #time of speciation
 T2<-numeric() #time of extinction
 nsp<-n0 #number of species
 T1[1:n0]<-0
 i<-0
 while (i<nsp)
 {
  i<-i+1
  dur<-rexp(1,mu) #duration
  T2[i]<-T1[i]+dur
  if (T2[i]>tmax)
  {
   T2[i]<-tmax #truncate duration if beyond tmax
   dur<-T2[i]-T1[i] #modify duration, if necessary, to be within specified time window
  }
  ndesc<-rpois(1,dur*lambda) #number of descendants
  if (ndesc>0)
  {
   T1[(nsp+1):(nsp+ndesc)]<-T1[i]+runif(ndesc,max=dur) #origins of descendants uniform along ancestor's duration
   nsp<-nsp+ndesc
  }
 }
 return(list(T1=T1,T2=T2))
}


#Degrade vector of observed durations and sampling rates (s) into observed stratigraphic ranges.
#T1=times of origination; T2=times of extinction.
#FAD=preserved first appearance datums; LAD=last appearance datums.
degrade<-function(T1,T2,s)
{
 n<-length(T1)
 FAD<-LAD<-rep(NA,n)
 for (i in 1:n)
 {
  k<-rpois(1,(T2[i]-T1[i])*s[i]) #number of stratigraphic levels
  if (k>0)
  {
   levels<-runif(k,min=T1[i],max=T2[i])
   FAD[i]<-min(levels)
   LAD[i]<-max(levels)
  }
 }
 return(list(FAD=FAD,LAD=LAD))
}

#Functions for sampling rate that varies sinusoidally over absolute time.
#Time goes from t = 0 to t = tmax.
#k is the frequency (number of cycles between t = 0 and t = tmax.
#Sampling rate varies from s = smean x (1-xamp) to smean x (1+xamp).

#Sampling rate as a function of time.
f1<-function(t,tmax,k,smean,xamp)
{
 return(smean+xamp*smean*sin(k*t*2*pi/tmax))
}

#Integral of function f1 from time t1 to t2.
F1<-function(t1,t2,tmax,k,smean,xamp)
{
 a<-smean*(xamp*tmax*(cos(2*pi*t1*k/tmax)-cos(2*pi*t2*k/tmax))/(2*pi*k) - t1 + t2)
 return(a)
}

#Scale the preceding integral to have value of 0.0 at t1 and 1.0 at t2.
#Find absolute deviation between this value and a random uniform deviate, U, on [0,1].
#Subsequently map U onto a time of sampling within species history by minimizing this deviation.
Dev1<-function(t,U,t1,t2,tmax,k,rmean,xamp) #t is betweeen t1 and t2
{
 F<-F1(t1,t,tmax,k,rmean,xamp)/F1(t1,t2,tmax,k,rmean,xamp) #scaled so F at t2=1.0
 return(abs(U-F))
}

degrade1<-function(T1,T2,tmax,k,smean,xamp)
{
 n<-length(T1)
 FAD<-LAD<-rep(NA,n)
 for (i in 1:n)
 {
  if (k==0)
  {
   lambda<-(T2[i]-T1[i])*smean
  }
  else
  {
   lambda<-F(T1[i],T2[i],tmax,k,smean,xamp)
  }
  k<-rpois(1,lambda)
  if (k>0)
  {
   levels<-rep(NA,k)
   for (h in 1:k)
   {
    U<-runif(1) #Generate uniform deviate and find the value of t to which it corresponds.
    ans<-optimize(Dev1,interval=c(T1[i],T2[i]),U=U,t1=T1[i],T2=LO[i],tmax=tmax,k=k,smean=smean,xamp=xamp)
    levels[h]<-ans$minimum
   }
   FAD[i]<-min(levels)
   LAD[i]<-max(levels)
  }
 }
 return(list(FAD=FAD,LAD=LAD))
}

#Sampling rate within lifetime of species, varying from smean x (1-xamp) to smean x (1+xamp)
#for 1/2 wave length between t = 0 and t = dur.
f2<-function(t,dur,smean,xamp)
{
 a<-smean*2*xamp
 b<-smean*(1-xamp)
 return(b + a*sin(t*pi/dur))
}

#Integral of f2 from t = 0 to t = t.
F2<-function(t,dur,smean,xamp) #function f integrated from FO to LO
{
 a<-smean*2*xamp
 b<-smean*(1-xamp)
 return(a*(dur-dur*cos(pi*t/dur))/pi + b*t )
}

Dev2<-function(tx,U,dur,smean,xamp) #tx is betweeen t = 0 and t = dur.
{
 F<-F2(tx,dur,smean,xamp)/F2(dur,dur,smean,xamp) #scaled so F at t=dur is 1.0
 return(abs(U-F))
}

degrade2<-function(DUR,smean,xamp)
{
 n<-length(DUR)
 FAD<-LAD<-rep(NA,n)
 for (i in 1:n)
 {
  lambda<-F2(DUR[i],DUR[i],smean,xamp)
  k<-rpois(1,lambda)
  if (k)>0)
  {
   levels<-rep(NA,k)
   for (h in 1:k)
   {
    U<-runif(1)
    ans<-optimize(Dev2,interval=c(0,DUR[i]),U=U,dur=DUR[i],smean=smean,xamp=xamp)
    levels[h]<-ans$minimum
   }
   FAD[i]<-min(levels)
   LAD[i]<-max(levels)
  }
 }
 return(list(FAD=FAD,LAD=LAD))
}
